# Supplementary material for: Effects of Phosphate-solubilizing Bacteria on Soil Phosphorus Fractions and Supply to Maize Seedlings Grown in Lateritic Red Earths and Cinnamon Soils
Source: PubMed Central journal article supplement (PMC10308236; doi:10.1264/jsme2.me22075), 2023-05-23
Supplement: 38_22075_s1.pdf [file 38_22075_s1.pdf]

**Table S1.** Changes of labile P, moderately labile P and HCl P in La inoculation experiment (mg-P kg<sup>-1</sup> soil)

| Group   | Labile P | Labile P Increase   |                 | Moderately labile P | Moderately labile P Increase |                 | HCl P decrease      |
|---------|----------|---------------------|-----------------|---------------------|------------------------------|-----------------|---------------------|
| La-Ctrl | 0.27     |                     |                 | 23.71               |                              |                 |                     |
|         |          | Relative to La-Ctrl |                 |                     | Relative to La-Ctrl          |                 | Relative to La-Ctrl |
| LaA     | 0.31     | 0.04                |                 | 25.39               | 1.68                         |                 | 0.06                |
| LaB     | 0.49     | 0.22                |                 | 29.05               | 5.34                         |                 | 0.07                |
| LaF     | 0.33     | 0.06                |                 | 25.00               | 1.29                         |                 | 0.06                |
| LaG     | 0.33     | 0.06                |                 | 26.43               | 2.72                         |                 | 0.07                |
| LaH     | 0.30     | 0.03                |                 | 26.20               | 2.49                         |                 | 0.05                |
| LaP     | 0.94     | 0.67                |                 | 43.43               | 19.72                        |                 |                     |
|         |          |                     | Relative to LaP |                     |                              | Relative to LaP | Relative to LaP     |
| LaAP    | 1.94     | 1.67                | 1.00            | 53.78               | 30.07                        | 10.35           | 20                  |
| LaBP    | 1.23     | 0.96                | 0.29            | 52.04               | 28.33                        | 8.61            | 15                  |
| LaFP    | 0.99     | 0.72                | 0.05            | 44.92               | 21.21                        | 1.49            | 4                   |
| LaGP    | 1.16     | 0.89                | 0.22            | 47.54               | 23.83                        | 4.11            | 1                   |
| LaHP    | 1.25     | 0.98                | 0.31            | 46.75               | 23.04                        | 3.32            | 9                   |

La-Ctrl: control, La with P-free NBRIP adding; LaA ~ LaH: PSB treatment, La with A ~ H strains inoculation; LaP: TCP treatment, La with TCP supply; LaAP ~ LaHP: Combination treatment, La with A~H strains inoculation and TCP supply; labile P: sum of Resin P, NaHCO<sub>3</sub>-Pi and NaHCO<sub>3</sub>-Po in Table 2; moderately labile P: sum of NaOH-Pi and NaOH-Po in Table 2.

**Table S2.** Changes of labile P, moderately labile P and HCl P in Ci inoculation experiment (mg-P kg<sup>-1</sup> soil)

| Group   | Labile P | Labile P Increase   |                 | Moderately labile P | Moderately labile P Increase |                 | HCl P decrease      |
|---------|----------|---------------------|-----------------|---------------------|------------------------------|-----------------|---------------------|
| Ci-Ctrl | 6.84     | Relative to Ci-Ctrl |                 | 5.13                | Relative to Ci-Ctrl          |                 | Relative to Ci-Ctrl |
| CiA     | 8.98     | 2.14                |                 | 5.80                | 0.67                         |                 | 7                   |
| CiB     | 9.88     | 3.04                |                 | 5.11                | -0.02                        |                 | 8                   |
| CiF     | 10.01    | 3.17                |                 | 5.11                | -0.02                        |                 | 7                   |
| CiG     | 8.23     | 1.39                |                 | 5.18                | 0.05                         |                 | 3                   |
| CiH     | 8.44     | 1.60                |                 | 5.38                | 0.25                         |                 | 5                   |
| CiP     | 8.58     | 1.74                |                 | 5.14                | 0.01                         |                 |                     |
|         |          |                     | Relative to CiP |                     |                              | Relative to CiP | Relative to CiP     |
| CiAP    | 11.7     | 4.86                | 3.12            | 6.14                | 1.00                         | 0.99            | 13                  |
| CiBP    | 10.63    | 3.79                | 2.05            | 5.29                | 0.15                         | 0.14            | 10                  |
| CiFP    | 10.77    | 3.93                | 2.19            | 5.37                | 0.23                         | 0.22            | 8                   |
| CiGP    | 9.22     | 2.38                | 0.64            | 5.94                | 0.80                         | 0.79            | 7                   |
| CiHP    | 10.01    | 3.17                | 1.43            | 5.52                | 0.38                         | 0.37            | 7                   |

Ci-Ctrl: control, Ci with P-free NBRIP adding; CiA ~ CiH: PSB treatment, Ci with A ~ H strains inoculation; CiP: TCP treatment, Ci with TCP supply; CiAP ~ CiHP: Combination treatment, Ci with A~H strains inoculation and TCP supply; labile P: sum of Resin P, NaHCO<sub>3</sub>-Pi and NaHCO<sub>3</sub>-Po in Table 3; moderately labile P: sum of NaOH-Pi and NaOH-Po in Table 3.

Table S3. Changes of labile P, moderately labile P and HCl P in co-culture experiment (mg-P kg<sup>-1</sup> soil)

| Group   | Labile P | Increase            | Moderately labile P | Increase            |
|---------|----------|---------------------|---------------------|---------------------|
| La-Ctrl | 0.26     | Relative to La-Ctrl | 24.23               | Relative to La-Ctrl |
| LaA     | 0.36     | 0.10                | 29.00               | 4.77                |
| LaP     | 1.18     | 0.92                | 51.10               | 26.87               |
| LaAP    | 2.11     | 1.85                | 59.10               | 34.87               |
| Ci-Ctrl | 7.40     | Relative to Ci-Ctrl | 6.41                | Relative to Ci-Ctrl |
| CiA     | 9.77     | 2.37                | 6.78                | 0.37                |
| CiP     | 12.08    | 4.68                | 6.36                | -0.05               |
| CiAP    | 14.44    | 7.04                | 6.88                | 0.47                |

La-Ctrl, Ci-Ctrl: control; LaA, CiA: PSB treatment; LaP, CiP: TCP treatment; LaAP, CiAP: combination treatment; labile P: sum of Resin P, NaHCO<sub>3</sub>-Pi and NaHCO<sub>3</sub>-Po in Table 4; moderately labile P: sum of NaOH-Pi and NaOH-Po in Table 4.

Table S4 Point-Biserial Correlation analysis

|                               | Soil type | PSB inoculation | TCP supply |
|-------------------------------|-----------|-----------------|------------|
| Maize seedling P accumulation | 0.859**   | 0.281**         | 0.249**    |

Maize seedling P accumulation: continuous variable.

Soil type, PSB inoculation and TCP supply: categorical variable, assign "0" to "La", "no PSB inoculation" and "no TCP supply"; assign "1" to "Ci", "PSB inoculation" and "TCP supply".

\*\*  $P < 0.01$
